# Supplementary material for: Effect of Hydrophobic and Hydrophilic Metal Oxide Nanoparticles on the Performance of Xanthan Gum Solutions for Heavy Oil Recovery
Source: PubMed Central journal article supplement (PMC6358868; doi:10.3390/nano9010094), 2019-01-12
Supplement: nanomaterials-09-00094-s001.pdf [file nanomaterials-09-00094-s001.pdf]

Table S1. Average particle size measurement using DLS.

| Nanoparticle type              | NaCl concentration, wt.% | Particle size |             |          |             |
|--------------------------------|--------------------------|---------------|-------------|----------|-------------|
|                                |                          | size, nm      | % intensity | size, nm | % intensity |
| SiO <sub>2</sub>               | 0                        | 29.7          | 80.6        | 3198.7   | 39.4        |
|                                | 0.3                      | 47.4          | 77.5        | 3345.1   | 22.5        |
|                                | 1.0                      | 53.1          | 65.3        | 3640.7   | 34.7        |
| SiO <sub>2</sub> -OTES         | 0                        | 28.5          | 87.5        | 3320.4   | 12.5        |
|                                | 0.3                      | 55.3          | 81.2        | 3287.9   | 18.8        |
|                                | 1.0                      | 61.3          | 77.5        | 3647.7   | 22.5        |
| SiO <sub>2</sub> -MPS          | 0                        | 76.0          | 77.2        | 3188.4   | 22.8        |
|                                | 0.3                      | 89.7          | 50.7        | 3870.4   | 49.3        |
| Fe(OH) <sub>3</sub>            | 0.3                      | 16.7          | 80.4        | 3032.2   | 19.6        |
|                                | 1.0                      | 26.5          | 67.9        | 3156.8   | 32.1        |
| TiO <sub>2</sub>               | 0                        | 55.0          | 81.3        | 3134.2   | 18.7        |
|                                | 0.3                      | 58.4          | 74.5        | 3361.3   | 25.5        |
|                                | 1.0                      | 66.4          | 69.0        | 3583.4   | 21.0        |
| Al <sub>2</sub> O <sub>3</sub> | 0                        | 69.8          | 87.9        | 3325.6   | 12.1        |
|                                | 0.3                      | 80.0          | 54.1        | 3525.3   | 45.9        |
|                                | 1.0                      | 87.9          | 51.7        | 3897.1   | 48.3        |
